# Supplementary figures and images for: Bile sequestration potential of an edible mineral (clinoptilolite) under simulated digestion of a high-fat meal: an in vitro investigation
Source: Royal Society of Chemistry journal article supplement (doi:10.1039/c5fo00116a), 2015-01-01

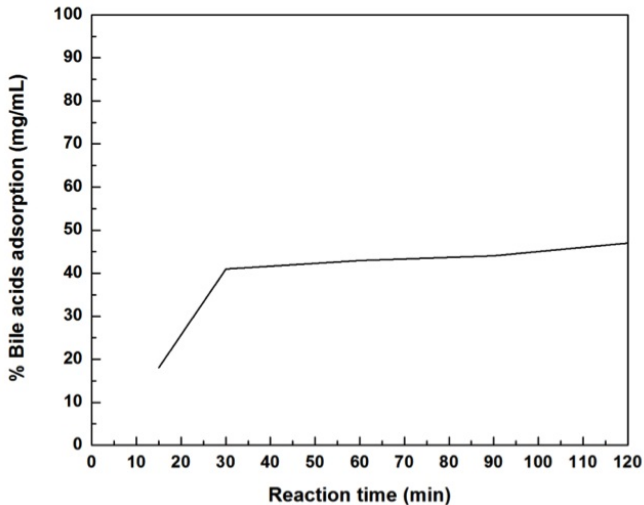

Supplement: c5fo00116a2.pdf [file c5fo00116a2.pdf]
